# Supplementary material for: Nrf2 activation in the human brain after stroke due to supratentorial intracerebral haemorrhage: a case–control study
Source: PubMed Central journal article supplement (PMC8860052; doi:10.1136/bmjno-2021-000238), 2022-02-19
Supplement: bmjno-2021-000238supp001.pdf [file bmjno-2021-000238supp001.pdf]

|                                                                       | Reference Numbers                                                                    | Peri-haematomal                      | Ipsilateral                            | Contralateral                     |
|-----------------------------------------------------------------------|--------------------------------------------------------------------------------------|--------------------------------------|----------------------------------------|-----------------------------------|
| ICH<br>epicentre<br>recorded<br>as <b>lobar</b><br>( <b>frontal</b> ) | 044/14                                                                               | BA24 Anterior cingulate gyrus (R)    | BA17 Occipital (R)                     | BA17 Occipital (L)                |
|                                                                       | 043/14                                                                               | BA46 Frontal convexity (R)           | BA19 Occipital (R)                     | BA19 Occipital (L)                |
|                                                                       | 012/12                                                                               | BA24 Anterior cingulate gyrus (R)    | Periventricular white matter (R)       | Periventricular white matter (L)  |
|                                                                       | 007/13                                                                               | BA24 Anterior cingulate gyrus (L)    | Amygdala (L)                           | Amygdala (R)                      |
|                                                                       | 038/10                                                                               | Anterior hippocampus (L)             | BA24 Anterior cingulate gyrus (L)      | BA24 Anterior cingulate gyrus (R) |
|                                                                       | 027/10                                                                               | BA8 Anterior frontal convexity (R)   | Posterior hippocampus (R)              | Posterior hippocampus (L)         |
|                                                                       | 034/11                                                                               | BA8 Anterior frontal convexity (R)   | Anterior hippocampus (R)               | Anterior hippocampus (L)          |
|                                                                       | 017/14                                                                               | BA4 Frontal motor (R)                | BA19 Occipital (R)                     | BA19 Occipital (L)                |
|                                                                       | 040/14                                                                               | BA46 Frontal convexity (R)           | BA19 Occipital (R)                     | BA19 Occipital (L)                |
|                                                                       | 034/12                                                                               | BA11 Inferior frontal (L)            | Amygdala (L)                           | Amygdala (R)                      |
|                                                                       | 051/13                                                                               | BA8 Anterior frontal convexity (R)   | BA19 Occipital (R)                     | BA19 Occipital (L)                |
|                                                                       | 010/13                                                                               | BA11 Inferior frontal (L)            | Amygdala (L)                           | Amygdala (R)                      |
|                                                                       | ICH<br>epicentre<br>recorded<br>as <b>deep</b><br>( <b>basal</b><br><b>ganglia</b> ) | 022/15                               | Basal ganglia mammillary body (L)      | BA19 Occipital (L)                |
| 034/16                                                                |                                                                                      | Basal ganglia mammillary body (L)    | BA19 Occipital (L)                     | BA19 Occipital (R)                |
| 013/13                                                                |                                                                                      | Basal ganglia mammillary body (R)    | Posterior hippocampus (R)              | Posterior hippocampus (L)         |
| 019/12                                                                |                                                                                      | BA41/42 Superior temporal gyrus (R)* | Periventricular white matter (R)*      | Hypothalamus (L)                  |
| 029/12                                                                |                                                                                      | BA44/45 Broca's area (L)*            | Amygdala (L)*                          | Amygdala (R)                      |
| 060/14                                                                |                                                                                      | Basal ganglia mammillary body (L)    | BA19 Occipital (L)                     | BA19 Occipital (R)                |
| 037/13                                                                |                                                                                      | BA20/21 Inferior temporal gyrus (L)* | Occipital white matter (L)*            | Occipital white matter (R)        |
| 014/12                                                                |                                                                                      | Frontal white matter (R)*            | Periventricular white matter (R)*      | Periventricular white matter (L)  |
| 038/14                                                                |                                                                                      | Basal ganglia mammillary body (L)    | BA19 Occipital (L)                     | BA19 Occipital (R)                |
| 024/16                                                                |                                                                                      | Basal ganglia mammillary body (L)    | BA19 Occipital (L)                     | BA19 Occipital (R)                |
| 054/12                                                                |                                                                                      | BA38 Temporal tip (L)                | Amygdala (L)                           | Amygdala (R)                      |
| 001/13                                                                |                                                                                      | Anterior hippocampus (R)             | Amygdala (R)                           | Amygdala (L)                      |
| 015/11                                                                |                                                                                      | Anterior hippocampus (L)             | Amygdala (L)                           | Amygdala (R)                      |
| 006/12                                                                | BA20/21 Inferior temporal gyrus (L)*                                                 | Periventricular white matter (L)*    | Periventricular white matter (R)       |                                   |
| <b>Controls</b><br>(sudden<br>death)                                  | 042/14                                                                               |                                      | BA9 Anterior frontal parasagittal (R)* |                                   |
|                                                                       | 014/13                                                                               |                                      | BA9 Anterior frontal parasagittal (L)* |                                   |
|                                                                       | 027/11                                                                               |                                      | BA9 Anterior frontal parasagittal (L)  |                                   |
|                                                                       | 013/09                                                                               |                                      | BA11 Inferior frontal (L)              |                                   |
|                                                                       | 039/05                                                                               |                                      | BA9 Anterior frontal parasagittal (L)  |                                   |
|                                                                       | 050/05                                                                               |                                      | BA9 Anterior frontal parasagittal (R)  |                                   |
|                                                                       | 009/09                                                                               |                                      | BA46 Frontal convexity (R)             |                                   |
|                                                                       | 002/06                                                                               |                                      | BA46 Frontal convexity (L)             |                                   |

**Supplementary table 1.** Brain regions of ICH cases and sudden death controls included in the study. Area selections and reference numbers were unblinded for this table but otherwise blinded throughout the study. BA=Brodman area, L=left; R=right. \*Tissue selected for RNA in-situ hybridisation analysis.

| Case                                          | Age at death (years) | Sex (M/F) | Dementia before ICH | ICH to death (days) | Post-mortem interval (hours) | ICH site | Cerebral amyloid angiopathy rating of lobar brain areas used* | Disease or condition leading directly to death** |
|-----------------------------------------------|----------------------|-----------|---------------------|---------------------|------------------------------|----------|---------------------------------------------------------------|--------------------------------------------------|
| <b>Died within 7 days of ICH onset</b>        |                      |           |                     |                     |                              |          |                                                               |                                                  |
| 044/14                                        | 91-95                | F         | Dementia            | 0                   | 118                          | Lobar    | Absent                                                        | ICH                                              |
| 043/14                                        | 76-80                | F         | No dementia         | 3                   | 40                           | Lobar    | Mild                                                          | ICH                                              |
| 012/12                                        | 86-90                | F         | No dementia         | 1                   | 155                          | Lobar    | Mild                                                          | ICH                                              |
| 022/15                                        | 61-65                | M         | Dementia            | 3                   | 28                           | Deep     |                                                               | Aspiration pneumonia                             |
| 034/16                                        | 76-80                | F         | No dementia         | 2                   | 68                           | Deep     |                                                               | ICH                                              |
| 013/13                                        | 86-90                | M         | No dementia         | 3                   | 53                           | Deep     |                                                               | ICH                                              |
| 019/12                                        | 81-85                | M         | No dementia         | 3                   | 107                          | Deep     |                                                               | ICH                                              |
| 029/12                                        | 41-45                | M         | No dementia         | 2                   | 98                           | Deep     |                                                               | ICH                                              |
| <b>Died between 7-60 days from ICH onset</b>  |                      |           |                     |                     |                              |          |                                                               |                                                  |
| 007/13                                        | 81-85                | M         | Dementia            | 8                   | 88                           | Lobar    | Moderate-Severe                                               | ICH                                              |
| 038/10                                        | 66-70                | F         | Dementia            | 9                   | 66                           | Lobar    | Severe                                                        | ICH                                              |
| 027/10                                        | 86-90                | M         | No dementia         | 21                  | 93                           | Lobar    | Moderate-Severe                                               | ICH                                              |
| 034/11                                        | 81-85                | F         | No dementia         | 44                  | 40                           | Lobar    | Severe                                                        | ICH                                              |
| 060/14                                        | 91-95                | F         | No dementia         | 8                   | 41                           | Deep     |                                                               | ICH                                              |
| 037/13                                        | 71-75                | M         | No dementia         | 10                  | 52                           | Deep     |                                                               | ICH                                              |
| 014/12                                        | 76-80                | M         | Dementia            | 21                  | 36                           | Deep     |                                                               | Bronchopneumonia                                 |
| 038/14                                        | 86-90                | F         | Dementia            | 41                  | 59                           | Deep     |                                                               | ICH                                              |
| 024/16                                        | 86-90                | F         | Dementia            | 58                  | 54                           | Deep     |                                                               | Hospital-acquired pneumonia                      |
| <b>Died later than 60 days from ICH onset</b> |                      |           |                     |                     |                              |          |                                                               |                                                  |
| 017/14                                        | 71-75                | M         | Dementia            | 110                 | 58                           | Lobar    | Severe                                                        | ICH                                              |
| 040/14                                        | 86-90                | F         | No dementia         | 139                 | 90                           | Lobar    | Severe                                                        | ICH                                              |
| 034/12                                        | 76-80                | M         | No dementia         | 270                 | 107                          | Lobar    | Severe                                                        | ICH                                              |
| 051/13                                        | 96-100               | F         | No dementia         | 932                 | 36                           | Lobar    | Mild                                                          | Bronchopneumonia                                 |
| 010/13                                        | 81-85                | M         | No dementia         | 996                 | 84                           | Lobar    | Severe                                                        | ICH                                              |
| 054/12                                        | 66-70                | M         | No dementia         | 64                  | 188                          | Deep     |                                                               | Bronchopneumonia                                 |
| 001/13                                        | 71-75                | M         | Dementia            | 161                 | 95                           | Deep     |                                                               | ICH                                              |
| 015/11                                        | 76-80                | F         | No dementia         | 265                 | 49                           | Deep     |                                                               | Bronchopneumonia                                 |
| 006/12                                        | 91-95                | F         | Dementia            | 492                 | 73                           | Deep     |                                                               | Bronchopneumonia                                 |

**Supplementary table 2.** Demographic characteristics of the ICH cases included in the study. M=male, F=female. Age at death is provided as a range to maximise anonymity.

\*Cerebral amyloid angiopathy rating was as previously defined in Rodrigues et al. *The Edinburgh CT and genetic diagnostic criteria for lobar intracerebral haemorrhage associated with cerebral amyloid angiopathy: model development and diagnostic test accuracy study. The Lancet Neurology.* March 2018; 17(3): 232-240.

*\*\*This information was ascertained from patients' Medical Certificates of Cause of Death (MCCDs) and was determined by the senior clinician responsible for the patient's care supported by independent review of patients' clinical records.*

| <i>Control</i> | <i>Age at death (years)</i> | <i>Sex (M/F)</i> | <i>Cause of death</i>            | <i>Post-mortem interval (hours)</i> |
|----------------|-----------------------------|------------------|----------------------------------|-------------------------------------|
| 042/14         | 61-65                       | M                | metastatic renal cell carcinoma  | 76                                  |
| 014/13         | 71-75                       | F                | pulmonary thromboembolism        | 41                                  |
| 027/11         | 76-80                       | F                | ruptured aneurysm of aortic root | 46                                  |
| 013/09         | 76-80                       | F                | ischaemic heart disease          | 45                                  |
| 039/05         | 76-80                       | F                | metastatic colon carcinoma       | 100                                 |
| 050/05         | 81-85                       | M                | aortic dissection                | 44                                  |
| 009/09         | 81-85                       | F                | myocardial infarction            | 50                                  |
| 002/06         | 76-80                       | M                | bronchopneumonia                 | 95                                  |

**Supplementary table 3.** Demographic characteristics of the sudden death controls included in the study. M=male, F=female. Age at death is provided as a range to maximise anonymity.

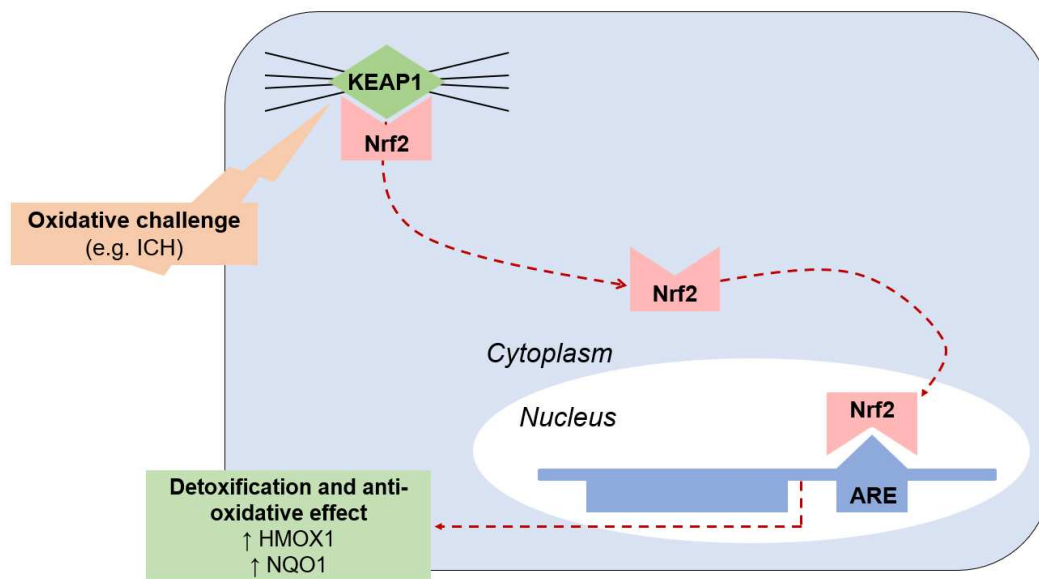

**Supplementary figure 1.** Simplified diagram illustrating the role of Nrf2 as master regulator of endogenous antioxidant defence pathway. The dashed line illustrates the fate of Nrf2 under oxidative conditions.

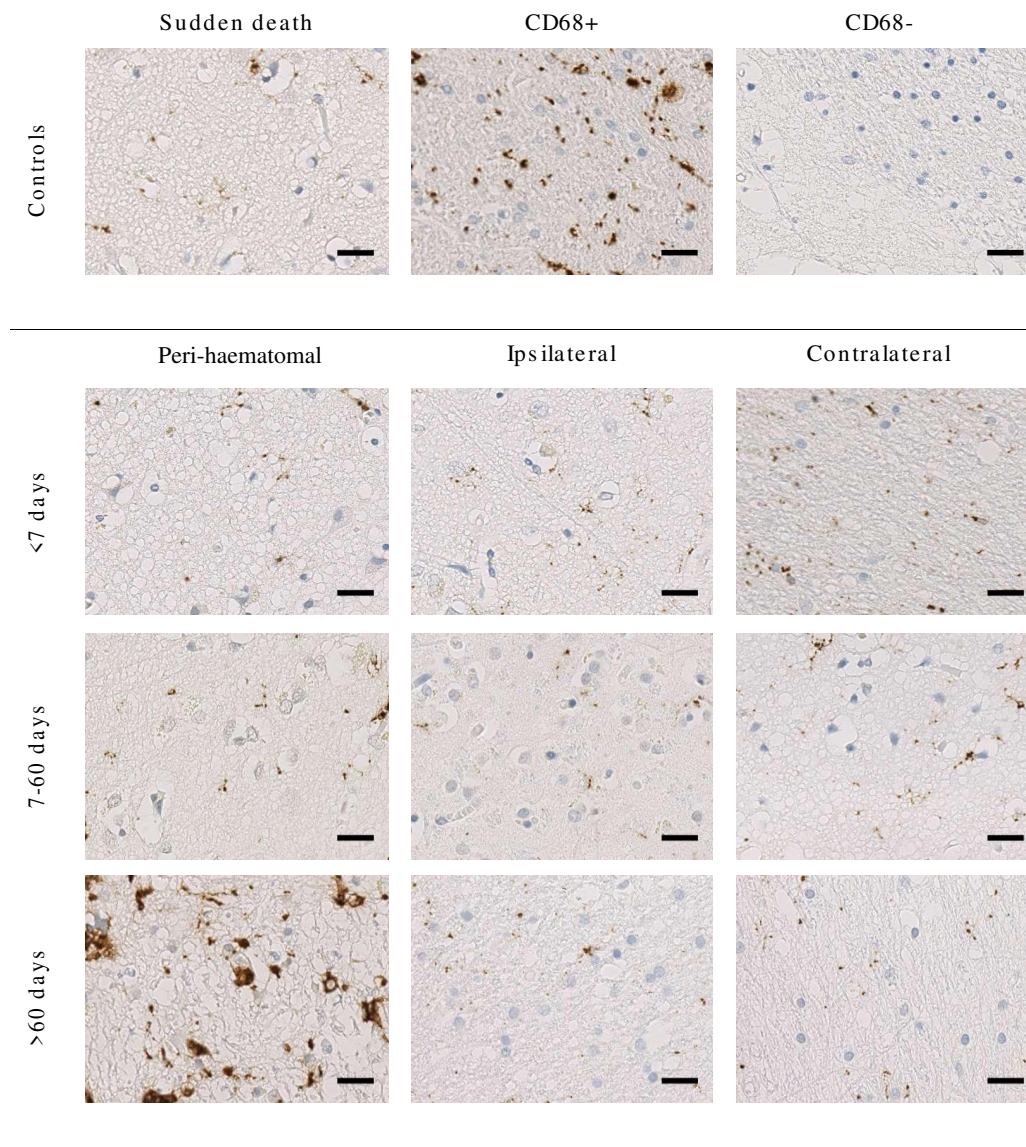

**Supplementary figure 2.** Representative images of CD68 immunohistochemical staining from ICH cases and sudden death controls included in the study. CD68+ and CD68- controls are shown on top row of middle and right column respectively as positive and negative controls. Images are all without manipulation and under the same magnification. Scale bars=20 $\mu$ m.

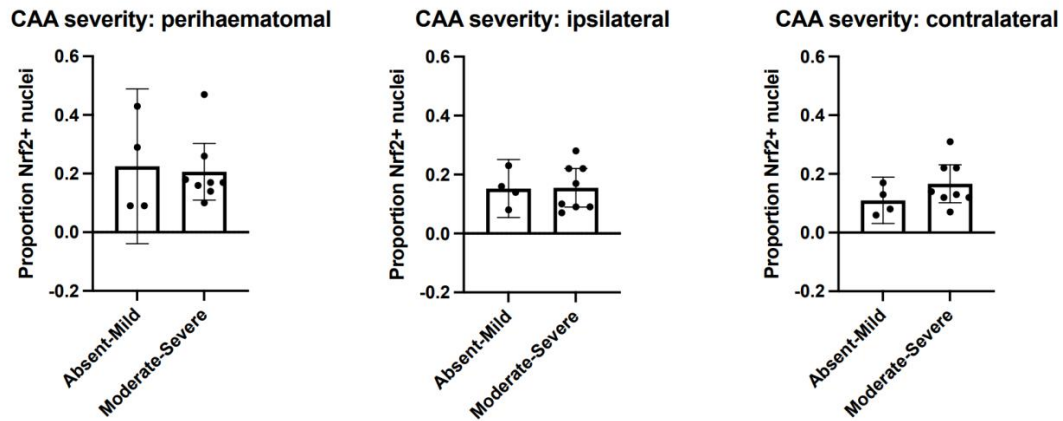

**Supplementary figure 3.** Mean (95% CI) proportion of nuclei stained positive for Nrf2 in lobar ICH tissue by location in relation to the ICH epicentre as well as cerebral amyloid angiopathy (CAA) ratings\*. Our data do not suggest an association between CAA severity and Nrf2 nuclear localisation.

\*Cerebral amyloid angiopathy rating was as previously defined in Rodrigues *et al.* *The Edinburgh CT and genetic diagnostic criteria for lobar intracerebral haemorrhage associated with cerebral amyloid angiopathy: model development and diagnostic test accuracy study.* *The Lancet Neurology.* March 2018; 17(3): 232-240.
